# Supplementary material for: Gender Equality and Gender Inequalities in Self-Reported Health: A Longitudinal Study of 27 European Countries 2004 to 2016
Source: PubMed Central journal article supplement (PMC8114429; doi:10.1177/0020731420960344), 2020-10-05
Supplement: sj-pdf-1-joh-10.1177_0020731420960344.pdf [file sj-pdf-1-joh-10.1177_0020731420960344.pdf]

**Gender equality and gender inequalities in self-reported health: A****longitudinal study of 27 European countries 2004 to 2016**Supplementary Table 1

Association of gender and self-reported health, for total sample and by country (2004 to 2016)

|                            |             | Male | Female | Adjusted for age and year * |        | Adjusted for age, educational level,<br>employment status and year * |        |
|----------------------------|-------------|------|--------|-----------------------------|--------|----------------------------------------------------------------------|--------|
|                            |             | %    | %      | OR (95%CI)                  |        | OR (95%CI)                                                           |        |
| Total Sample               |             |      |        | 1.17 (1.15–1.19)            | <0.001 | 0.97 (0.96–0.99)                                                     | 0.003  |
| <i>Low-Low</i>             | Bulgaria    | 4.6  | 5.9    | 1.23 (1.14–1.33)            | <0.001 | 1.09 (1.01–1.19)                                                     | 0.036  |
|                            | Czechia     | 5.2  | 5.9    | 1.12 (1.05–1.19)            | 0.001  | 0.89 (0.83–0.96)                                                     | 0.002  |
|                            | Estonia     | 5.6  | 6.0    | 0.96 (0.89–1.04)            | 0.327  | 1.03 (0.95–1.12)                                                     | 0.451  |
|                            | Greece      | 3.3  | 3.6    | 1.08 (0.99–1.17)            | 0.078  | 0.88 (0.79–0.97)                                                     | 0.011  |
|                            | Hungary     | 7.3  | 8.9    | 1.16 (1.11–1.22)            | <0.001 | 1.03 (0.98–1.08)                                                     | 0.282  |
|                            | Lithuania   | 5.7  | 7.6    | 1.26 (1.16–1.38)            | <0.001 | 1.29 (1.18–1.42)                                                     | <0.001 |
|                            | Poland      | 6.5  | 7.6    | 1.11 (1.07–1.16)            | <0.001 | 0.94 (0.90–0.98)                                                     | 0.004  |
|                            | Romania     | 4.2  | 5.8    | 1.32 (1.23–1.42)            | <0.001 | 0.91 (0.84–0.98)                                                     | 0.020  |
|                            | Slovakia    | 6.3  | 8.2    | 1.16 (1.10–1.23)            | <0.001 | 0.93 (0.88–0.98)                                                     | 0.016  |
| <i>Low-Medium</i>          | Cyprus      | 3.8  | 4.0    | 1.09 (1.00–1.19)            | 0.053  | 0.79 (0.71–0.88)                                                     | <0.001 |
|                            | Italy       | 4.4  | 5.3    | 1.20 (1.15–1.25)            | <0.001 | 1.05 (1.00–1.10)                                                     | 0.076  |
|                            | Latvia      | 8.4  | 9.7    | 1.07 (1.01–1.13)            | 0.033  | 1.12 (1.05–1.20)                                                     | <0.001 |
|                            | Malta       | 1.6  | 2.0    | 1.27 (1.10–1.46)            | 0.001  | 0.75 (0.58–0.98)                                                     | 0.037  |
|                            | Portugal    | 8.9  | 13.0   | 1.53 (1.46–1.61)            | <0.001 | 1.36 (1.28–1.43)                                                     | <0.001 |
| <i>Medium-Medium</i>       | Austria     | 5.9  | 5.9    | 1.01 (0.94–1.07)            | 0.860  | 0.80 (0.74–0.84)                                                     | <0.001 |
|                            | France      | 4.8  | 5.6    | 1.18 (1.12–1.25)            | <0.001 | 1.02 (0.96–1.08)                                                     | 0.426  |
|                            | Germany     | 5.9  | 5.4    | 0.90 (0.86–0.95)            | <0.001 | 0.72 (0.68–0.76)                                                     | <0.001 |
|                            | Ireland     | 1.2  | 1.8    | 1.47 (1.23–1.74)            | <0.001 | 1.20 (0.98–1.48)                                                     | 0.079  |
|                            | Slovenia    | 9.2  | 9.5    | 1.01 (0.95–1.07)            | 0.752  | 0.91 (0.86–0.97)                                                     | 0.004  |
|                            | Spain       | 3.4  | 5.1    | 1.46 (1.38–1.54)            | <0.001 | 1.18 (1.10–1.26)                                                     | <0.001 |
| <i>High-High</i>           | Belgium     | 4.1  | 5.5    | 1.38 (1.29–1.49)            | <0.001 | 1.06 (0.98–1.16)                                                     | 0.149  |
|                            | Finland     | 3.2  | 3.0    | 0.89 (0.81–0.98)            | 0.015  | 0.93 (0.84–1.02)                                                     | 0.139  |
|                            | Luxembourg  | 5.1  | 5.7    | 1.15 (1.05–1.26)            | 0.004  | 0.91 (0.81–1.02)                                                     | 0.094  |
|                            | Netherlands | 2.1  | 3.0    | 1.47 (1.28–1.68)            | <0.001 | 0.95 (0.81–1.11)                                                     | 0.530  |
|                            | UK          | 2.6  | 3.1    | 1.25 (1.15–1.35)            | <0.001 | 1.08 (0.99–1.18)                                                     | 0.068  |
| <i>Very high-Very high</i> | Denmark     | 3.9  | 4.4    | 1.14 (1.02–1.27)            | 0.025  | 1.03 (0.91–1.16)                                                     | 0.641  |
|                            | Sweden      | 2.5  | 3.8    | 1.55 (1.39–1.73)            | <0.001 | 1.59 (1.42–1.78)                                                     | <0.001 |

---

\* Fixed-effects year

Supplementary Table 2

## Evolution of education and employment, by gender (% observations, by year)

|                       | 2004 | 2005 | 2006 | 2007 | 2008 | 2009 | 2010 | 2011 | 2012 | 2013 | 2014 | 2015 | 2016 |
|-----------------------|------|------|------|------|------|------|------|------|------|------|------|------|------|
| MEN                   |      |      |      |      |      |      |      |      |      |      |      |      |      |
| Educational level     |      |      |      |      |      |      |      |      |      |      |      |      |      |
| Up to lower secondary | 41.5 | 26.7 | 27.4 | 25.6 | 24.9 | 25.3 | 24.8 | 23.0 | 22.4 | 22.4 | 22.9 | 22.7 | 20.2 |
| Upper secondary       | 37.7 | 46.0 | 47.9 | 50.5 | 49.7 | 48.8 | 48.8 | 49.8 | 49.6 | 49.5 | 48.1 | 47.3 | 47.2 |
| Tertiary              | 20.8 | 27.3 | 24.8 | 23.9 | 25.4 | 25.8 | 26.4 | 27.2 | 28.0 | 28.2 | 29.0 | 30.0 | 32.6 |
| Employment status     |      |      |      |      |      |      |      |      |      |      |      |      |      |
| Employed              | 79.8 | 81.7 | 83.0 | 82.8 | 83.3 | 81.4 | 81.0 | 81.1 | 81.0 | 79.9 | 80.7 | 81.8 | 83.0 |
| Unemployed            | 8.2  | 7.9  | 7.3  | 6.7  | 6.7  | 8.5  | 9.2  | 9.6  | 10.2 | 11.4 | 11.1 | 10.3 | 9.1  |
| Retired               | 9.5  | 8.5  | 7.8  | 8.8  | 8.1  | 8.0  | 7.9  | 7.6  | 6.9  | 6.8  | 6.3  | 6.1  | 6.3  |
| Out of labor          | 2.5  | 2.0  | 1.9  | 1.8  | 1.9  | 2.1  | 1.9  | 1.8  | 1.8  | 1.8  | 1.9  | 1.8  | 1.8  |
| WOMEN                 |      |      |      |      |      |      |      |      |      |      |      |      |      |
| Educational level     |      |      |      |      |      |      |      |      |      |      |      |      |      |
| Up to lower secondary | 43.2 | 28.7 | 29.7 | 28.4 | 27.4 | 27.3 | 26.1 | 24.4 | 23.4 | 23.1 | 23.7 | 23.0 | 20.6 |
| Upper secondary       | 34.5 | 44.7 | 46.0 | 47.9 | 46.7 | 46.3 | 46.2 | 46.7 | 46.7 | 46.5 | 45.2 | 44.7 | 44.4 |
| Tertiary              | 22.3 | 26.6 | 24.3 | 23.8 | 25.9 | 26.4 | 27.7 | 28.8 | 29.9 | 30.5 | 31.1 | 32.3 | 35.0 |
| Employment status     |      |      |      |      |      |      |      |      |      |      |      |      |      |
| Employed              | 58.8 | 61.9 | 65.3 | 65.3 | 66.9 | 66.3 | 66.5 | 66.7 | 67.0 | 67.0 | 68.2 | 68.4 | 71.8 |
| Unemployed            | 8.4  | 8.1  | 7.5  | 7.1  | 6.3  | 7.3  | 7.7  | 8.0  | 8.7  | 9.3  | 9.3  | 9.3  | 8.6  |
| Retired               | 6.9  | 8.2  | 7.6  | 8.5  | 8.1  | 8.1  | 8.3  | 8.2  | 7.6  | 7.4  | 6.6  | 6.4  | 6.5  |
| Out of labor          | 25.9 | 21.8 | 19.6 | 19.2 | 18.8 | 18.3 | 17.7 | 17.3 | 16.7 | 16.3 | 16.0 | 15.9 | 13.1 |
