# Supplementary material for: Gender Equality and Gender Inequalities in Self-Reported Health: A Longitudinal Study of 27 European Countries 2004 to 2016
Source: PubMed Central journal article supplement (PMC8114429; doi:10.1177/0020731420960344), 2020-10-05
Supplement: sj-pdf-2-joh-10.1177_0020731420960344.pdf [file sj-pdf-2-joh-10.1177_0020731420960344.pdf]

Supplementary Figure 1  
 Clusters of countries by Gender Equality Index (2005 and 2015)

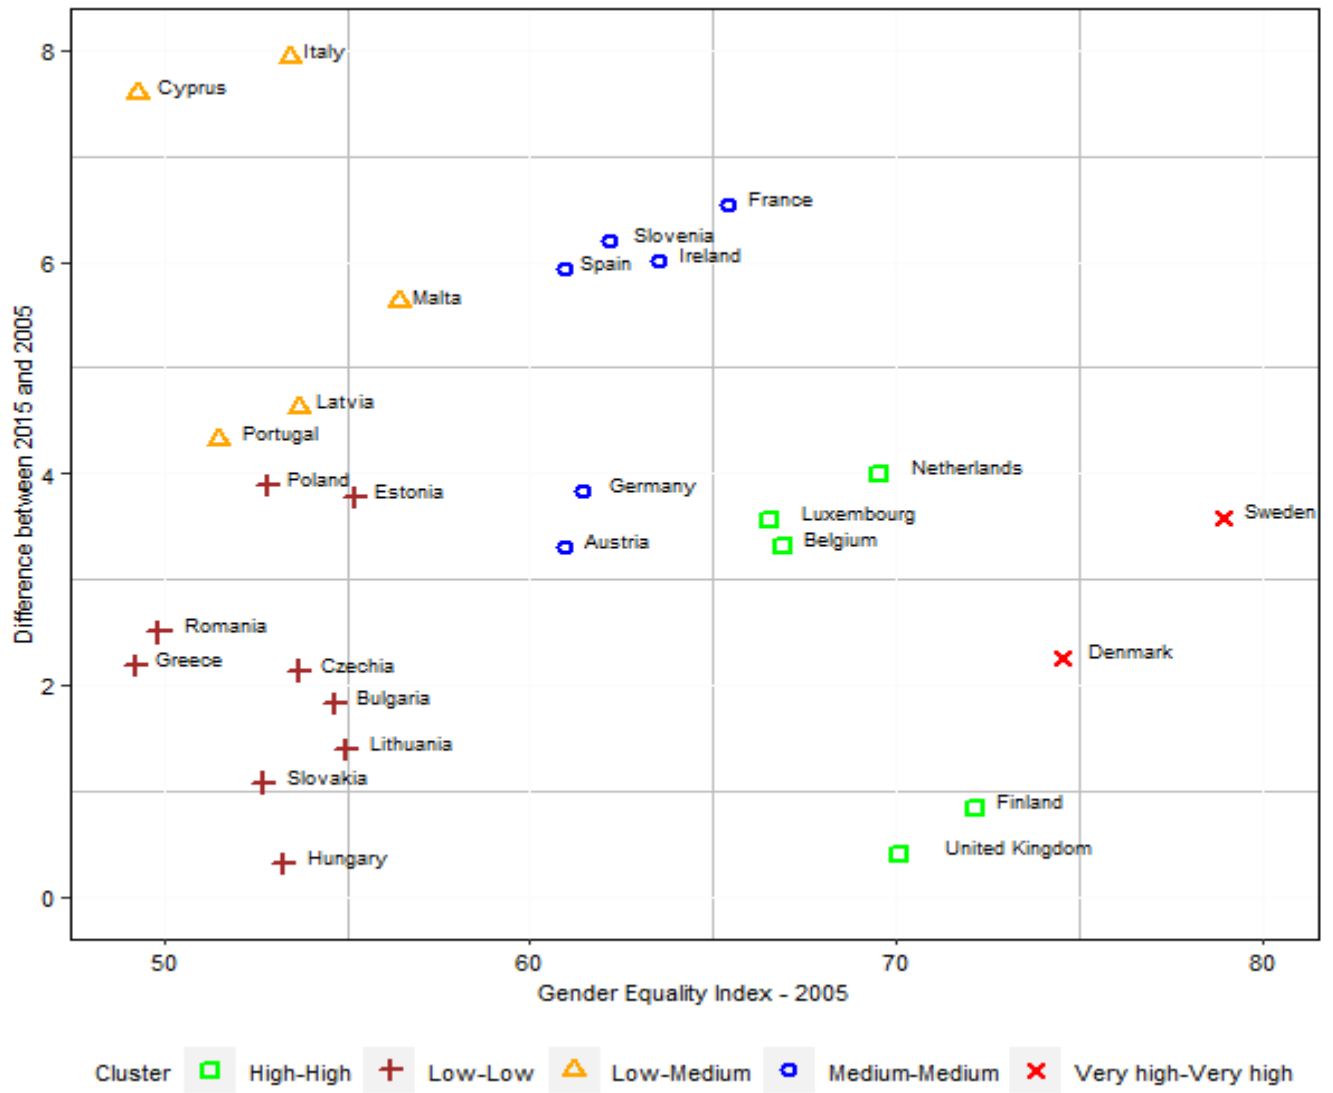

Supplementary Figure 2

Risk of female bad self-reported health (OR, 95%CI), versus men (gender\*year interaction), from 2004 to 2016, stratified by clusters of Gender Equality Index

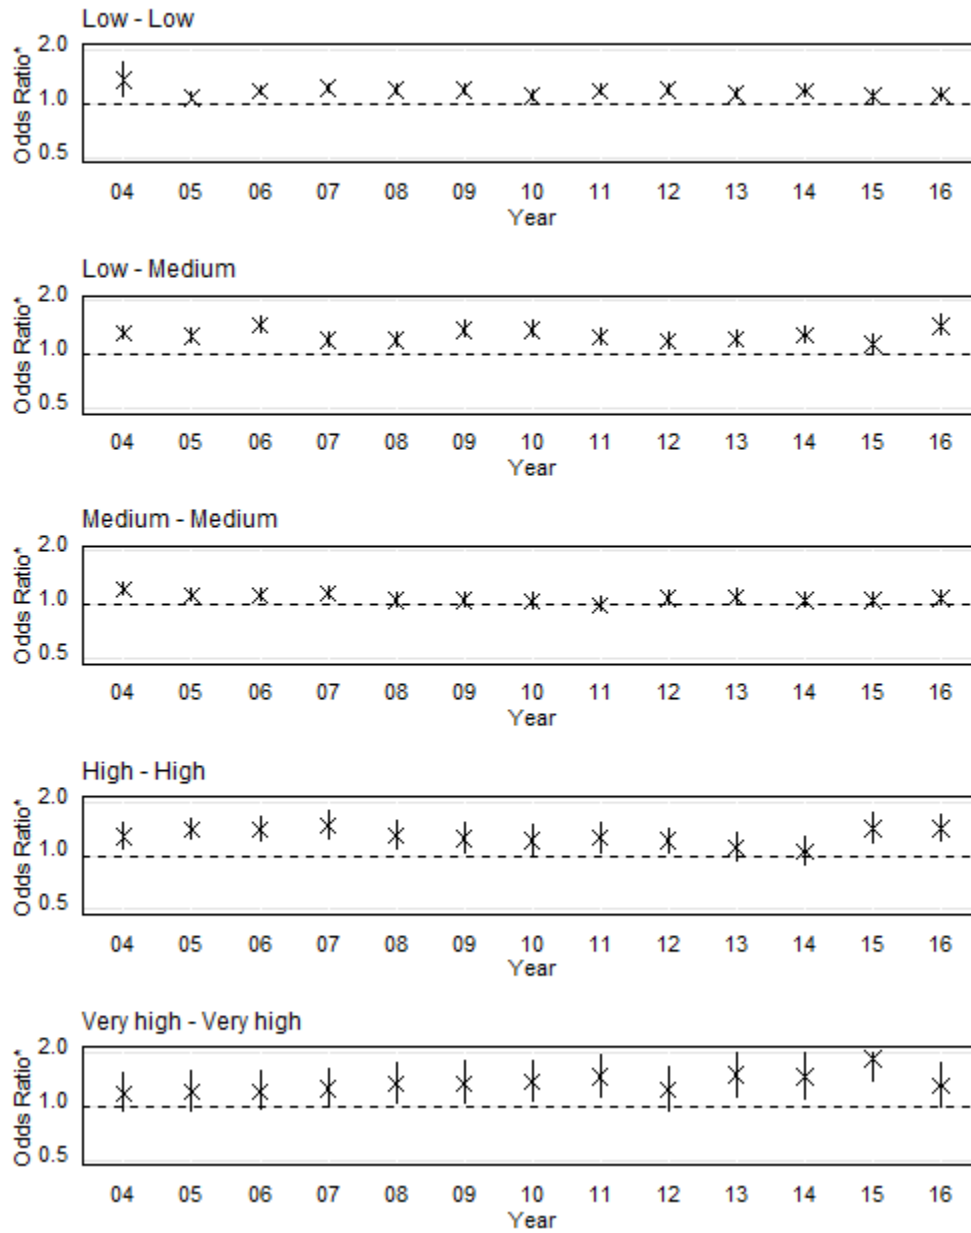

\* Odds Ratio adjusted for age, country and year
